# Supplementary material
Source: publisher figshare collection journal article supplement (https://karger.figshare.com/ndownloader/files/31217941)
Supplement: Supplementary file 1 [file 31217941]

## Sheet: Blad1
Gene	Alias
ACTC1	Actin Alpha Cardiac Muscle 1
ACTN2	Actinin Alpha 2
ALPK3	Alpha Kinase 3
ANKRD1	Ankyrin Repeat Domain 1
BAG3	BAG Cochaperone 3
CALR3	Calreticulin 3
CAV3	Caveolin 3
CDH2	Cadherin 2
CRYAB	Crystallin Alpha B
CSRP3	Cysteine And Glycine Rich Protein 3
CTNNA3	Catenin Alpha 3
DES	Desmin
DSC2	Desmocollin 2
DSG2	Desmoglein 2
DSP	Desmoplakin
EMD (STA)	Emerin
FHL1	Four And A Half LIM Domains 1
FHL2	Four And A Half LIM Domains 2
FKRP	Fukutin Related Protein
FLNC	Filamin C
GLA	Galactosidase Alpha
HCN4	Hyperpolarization Activated Cyclic Nucleotide Gated Potassium Channel 4
JPH2	Junctophilin 2
JUP	Junction Plakoglobin
LAMA4	Laminin Subunit Alpha 4
LAMP2	Lysosomal Associated Membrane Protein 2
LDB3	LIM Domain Binding 3
LMNA	Lamin A/C
MIB1	MIB E3 Ubiquitin Protein Ligase 1
MYBPC3	Myosin Binding Protein C3
MYH6	Myosin Heavy Chain 6
MYH7	Myosin Heavy Chain 7
MYL2	Myosin Light Chain 2
MYLK3	Myosin Light Chain Kinase 3
MYL3	Myosin Light Chain 3
MYOZ2	Myozenin 2
MYPN	Myopalladin
NEXN	Nexilin F-Actin Binding Protein
PKP2	Plakophilin 2
PLN	Phospholamban
PPA2	Inorganic Pyrophosphatase 2
PRDM16	PR/SET Domain 16
PRKAG2	Protein Kinase AMP-Activated Non-Catalytic Subunit Gamma 2
RBM20	RNA Binding Motif Protein 20
SCN5A	Sodium Voltage-Gated Channel Alpha Subunit 5
TAZ	Tafazzin
TCAP	Titin-Cap
TMEM43	Transmembrane Protein 43
TNNC1	Troponin C1, Slow Skeletal And Cardiac Type
TNNI3	Troponin I3, Cardiac Type
TNNI3K	TNNI3 Interacting Kinase
TNNT2	Troponin T2, Cardiac Type
TPM1	Tropomyosin 1
TTN	Titin
TTR	Transthyretin
VCL	Vinculin
